# Supplementary material
Source: PubMed Central journal article supplement (PMC5647579)
Supplement: NIHMS890995-supplement-Supp_Figure_S1.pdf [file NIHMS890995-supplement-Supp_Figure_S1.pdf]

# Supplementary Figure S1

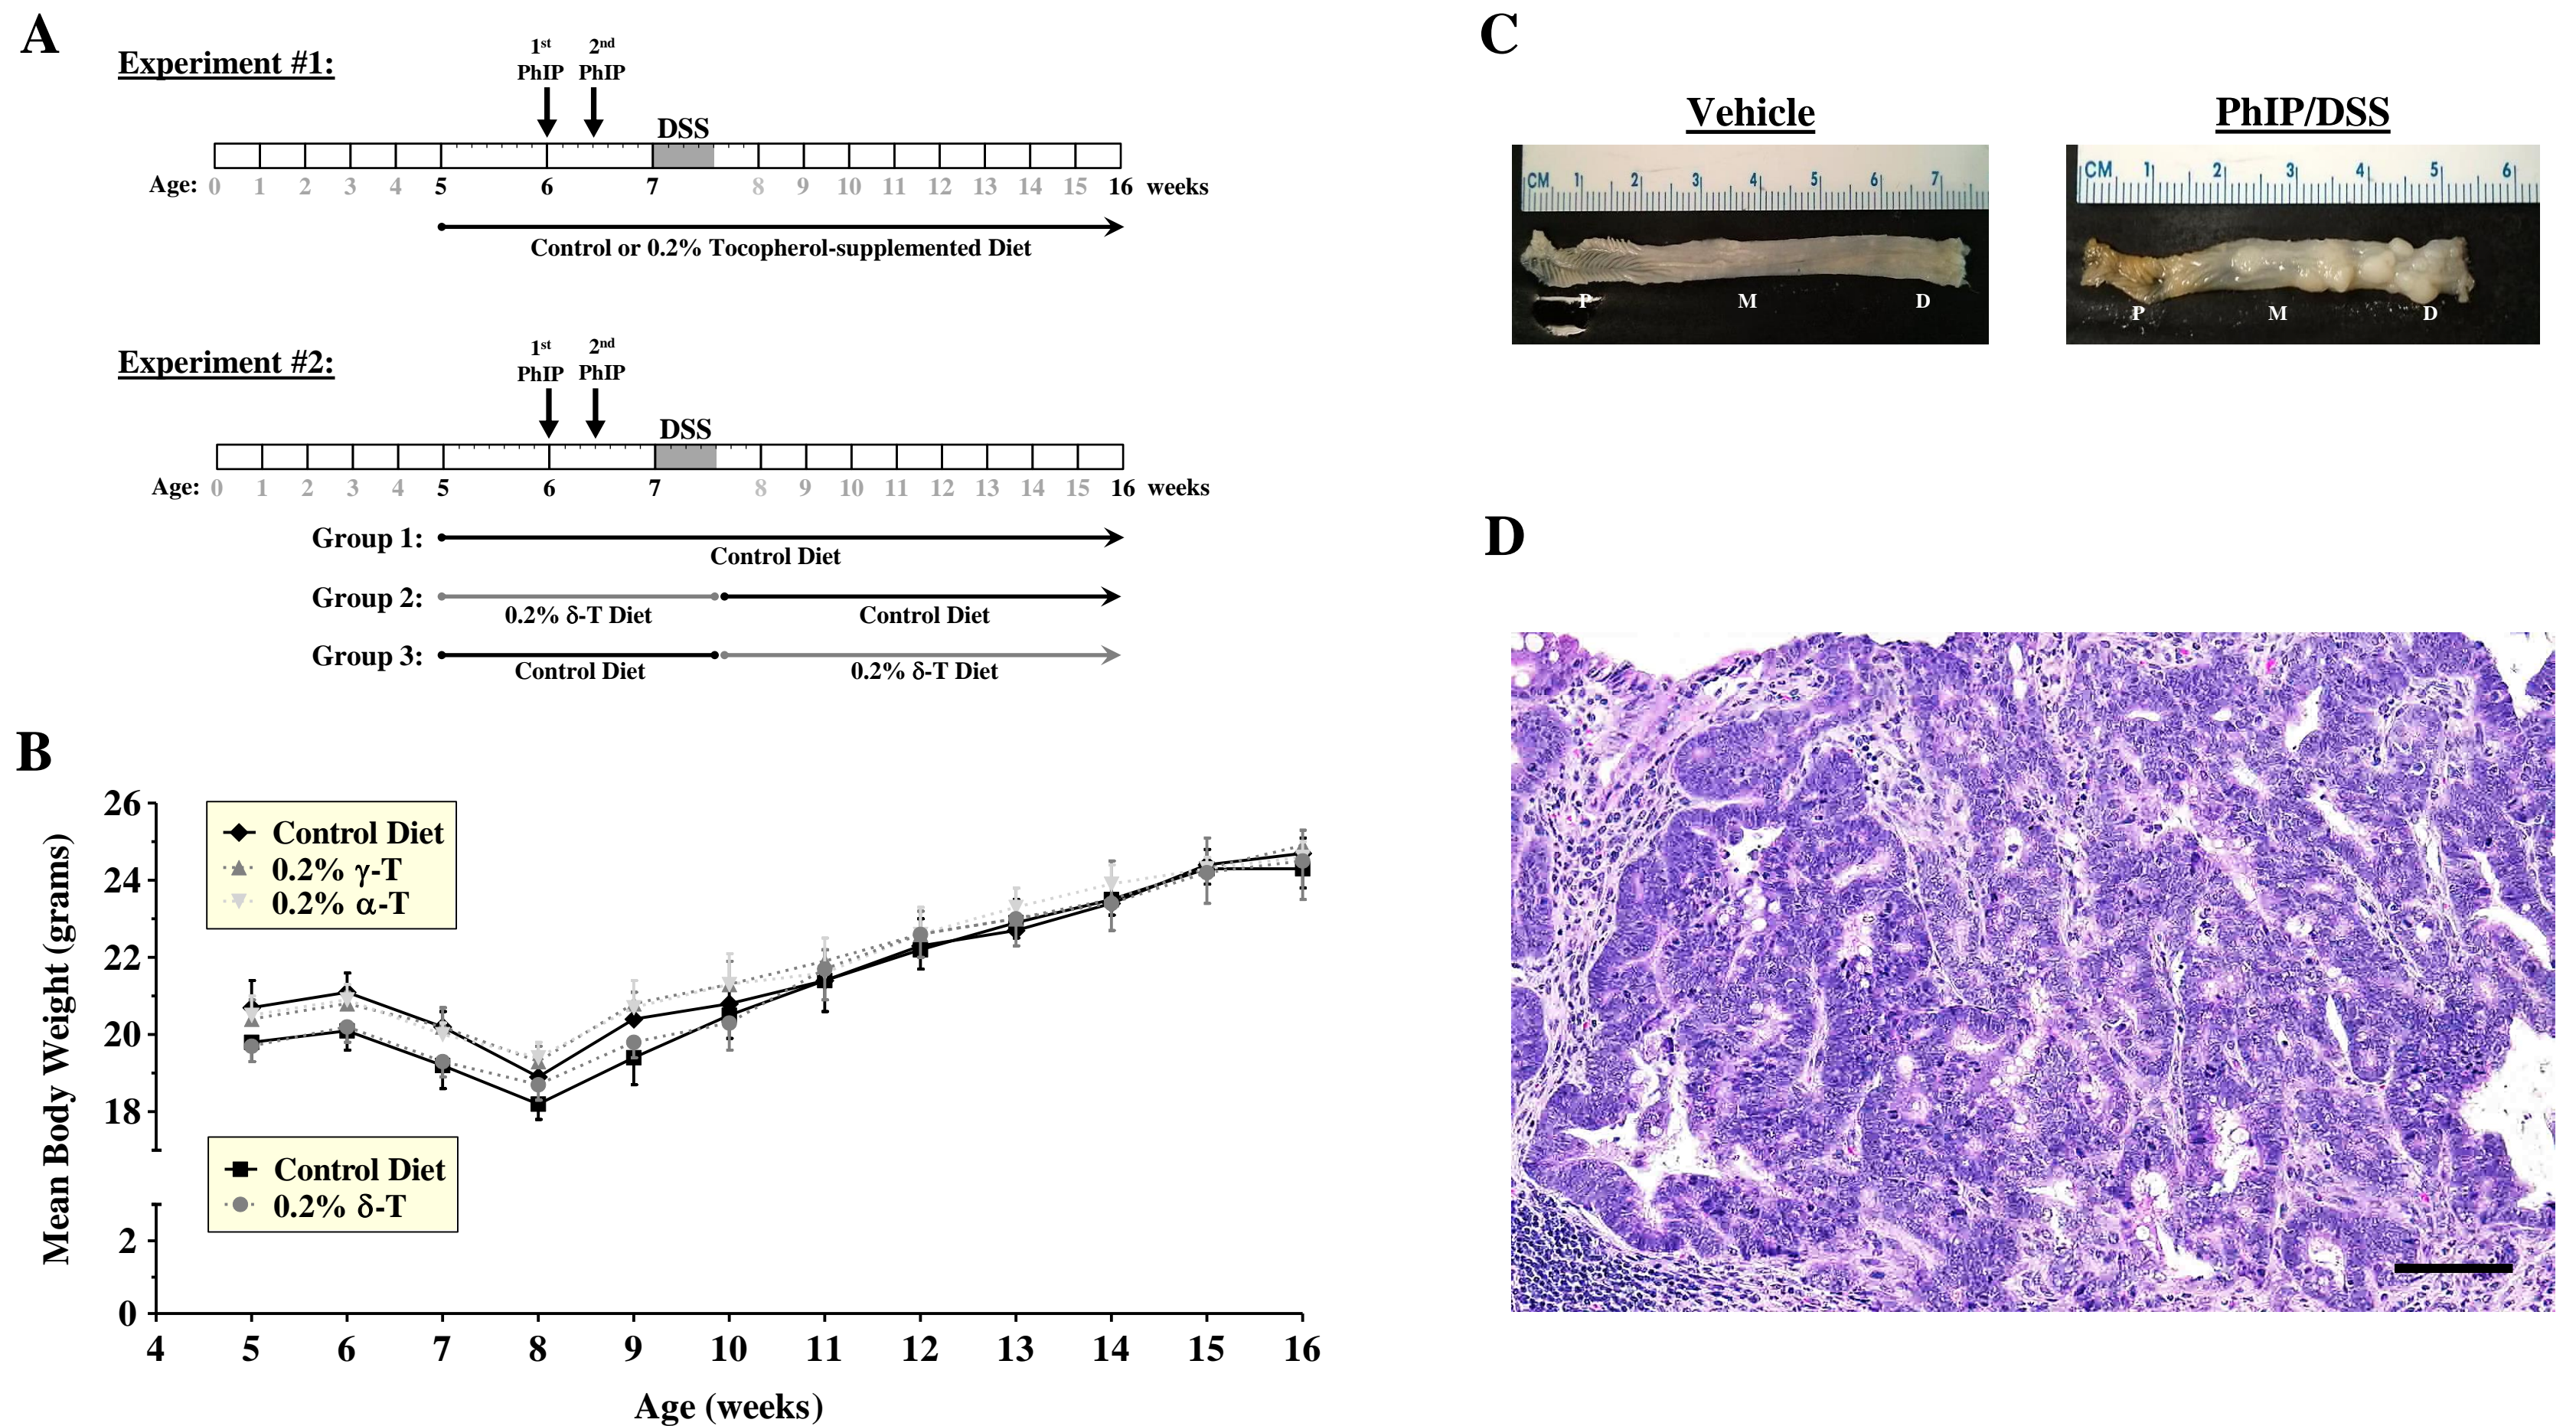

**Supplementary Figure S1. Studies of different tocopherols in PhIP/DSS-induced colon carcinogenesis.** **A**, schematics of PhIP/DSS-induced colon carcinogenesis and different dietary tocopherol supplementations. **B**, body weight changes in male hCYP1A mice showing ~10% reduction after PhIP/DSS treatment (data presented as mean  $\pm$  SEM). **C**, representative image of colon from vehicle-treated mice and PhIP/DSS-treated mice with multiple tumors after 10 weeks (P, proximal colon; M, middle colon; D, distal colon). **D**, representative image of hematoxylin and eosin staining of a colon tumor displaying histopathological features consistent with adenocarcinoma (scale bar represents 50  $\mu$ m).

# Supplementary Figure S2

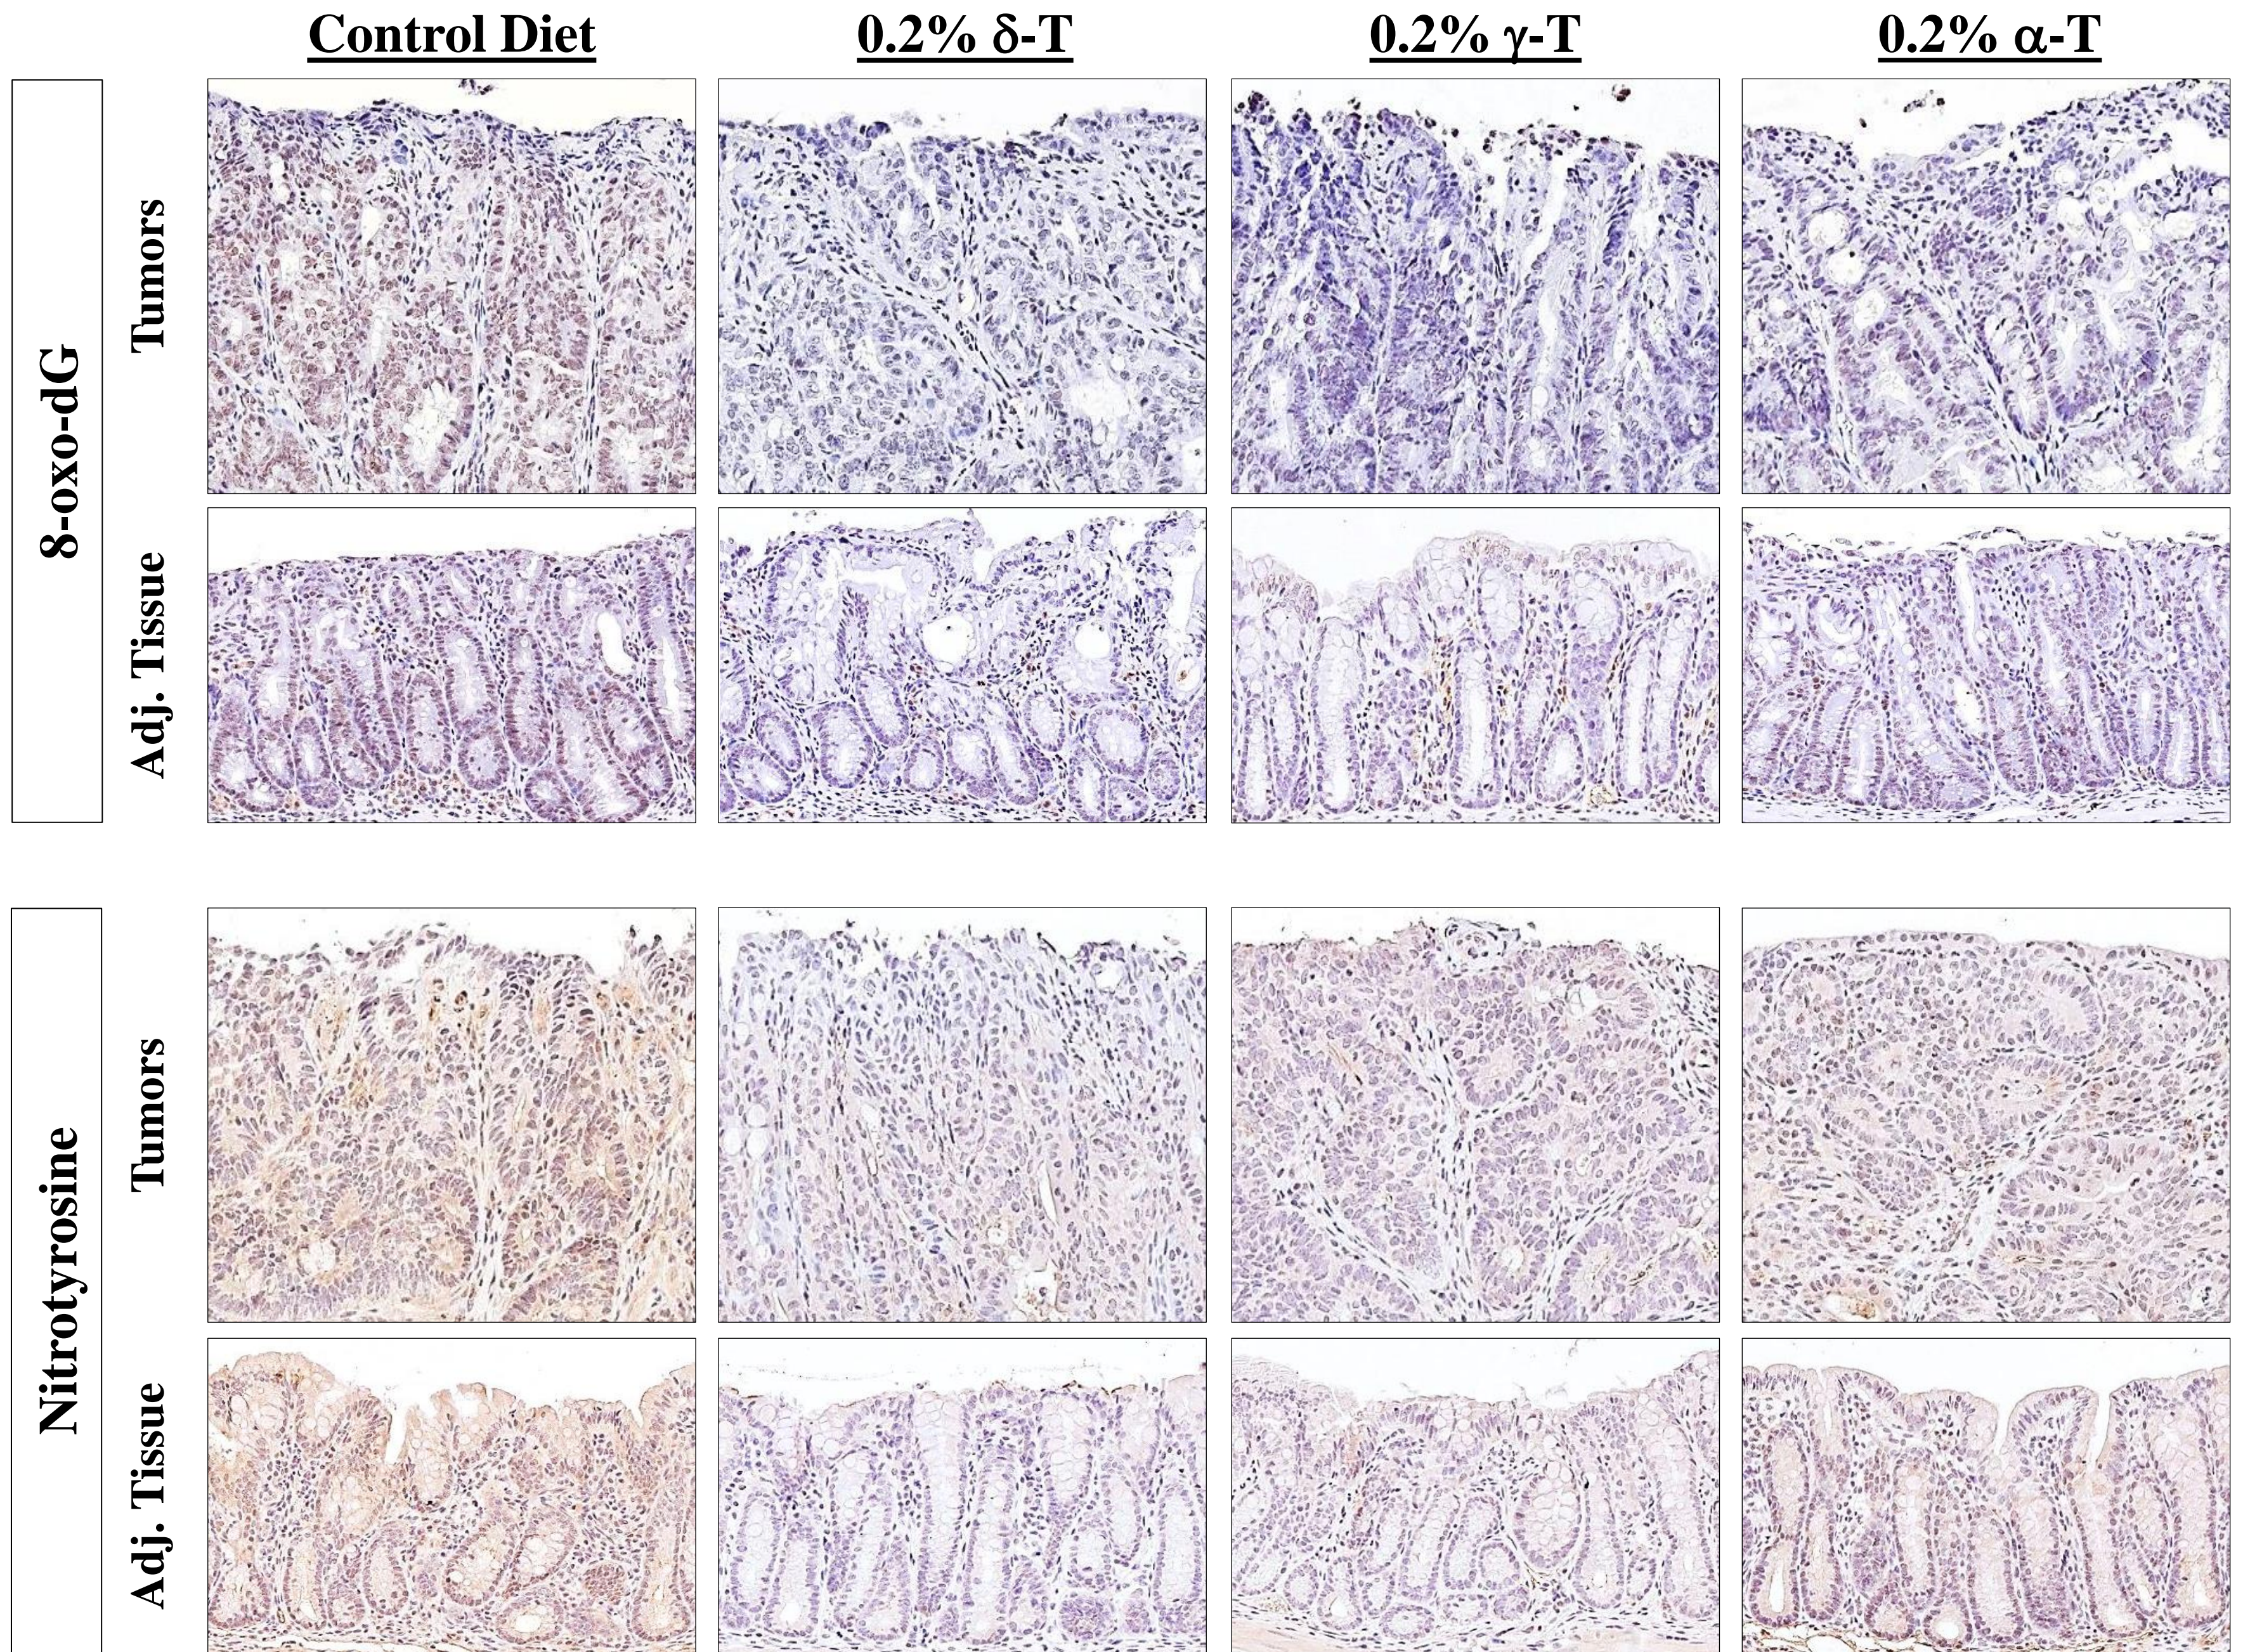

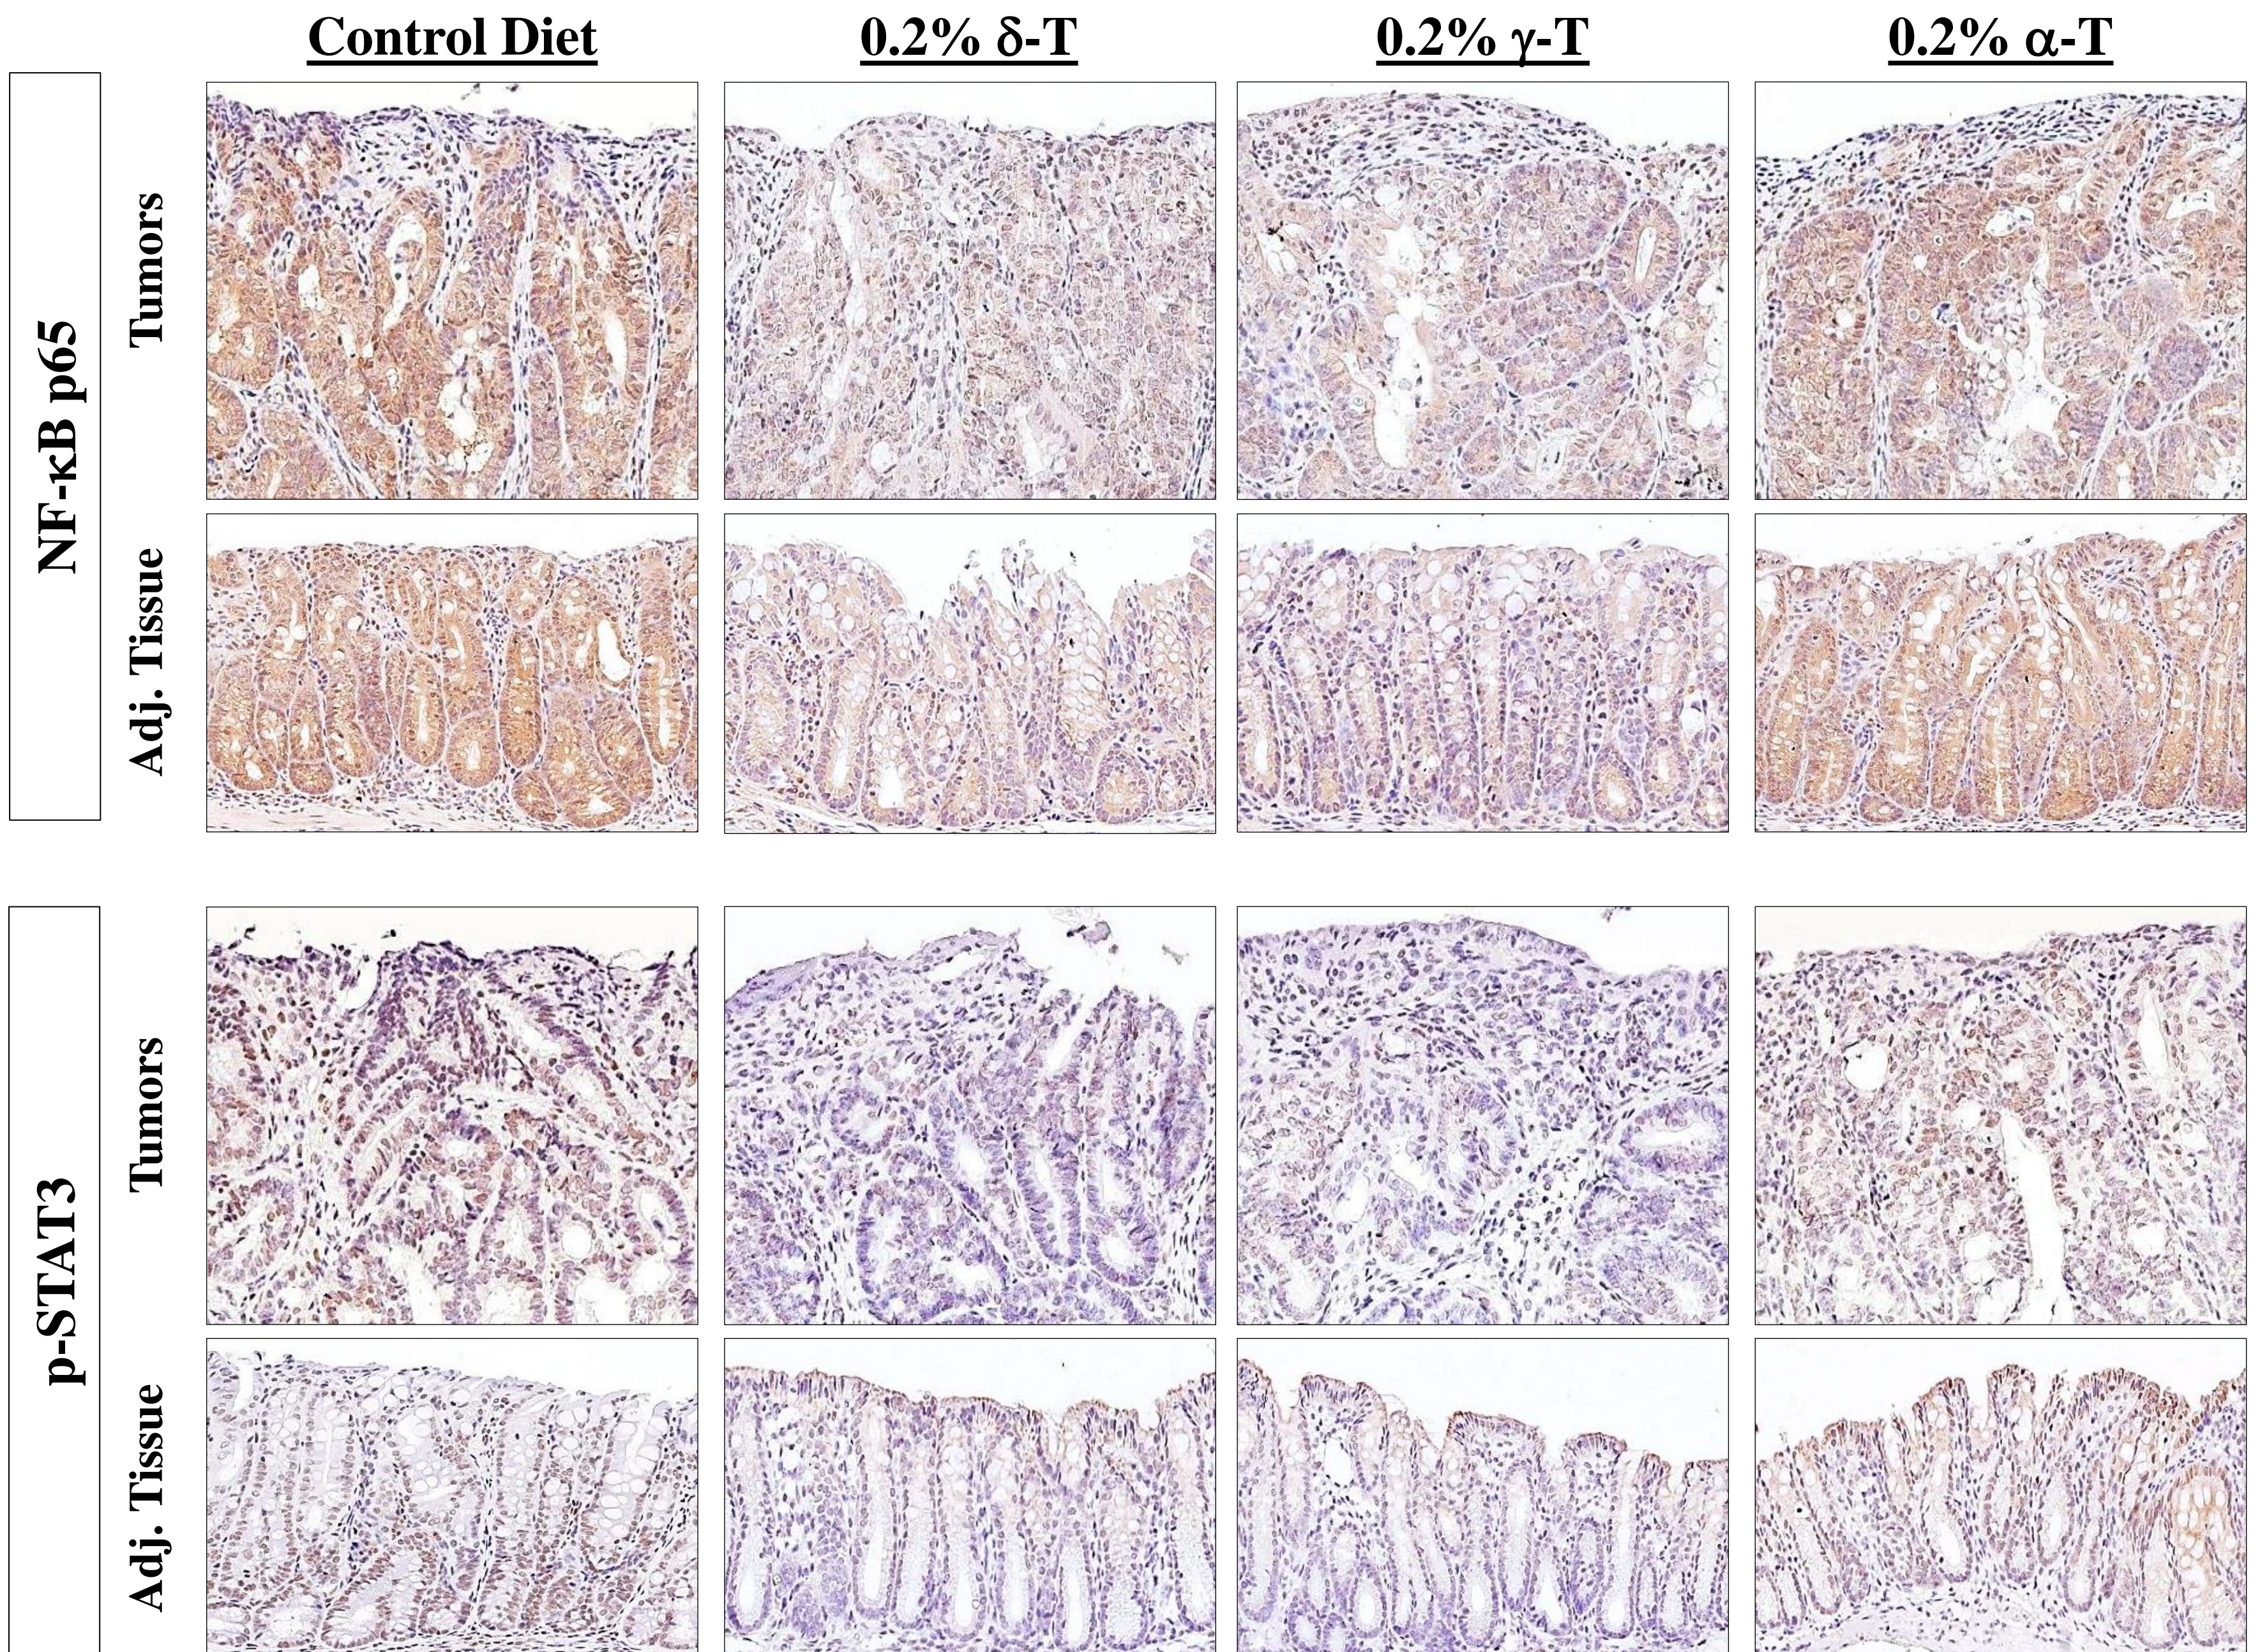

**Supplementary Figure S2. Higher resolution micrographs of Figure 2. See Figure 2 legend for description**

## Supplementary Figure S3

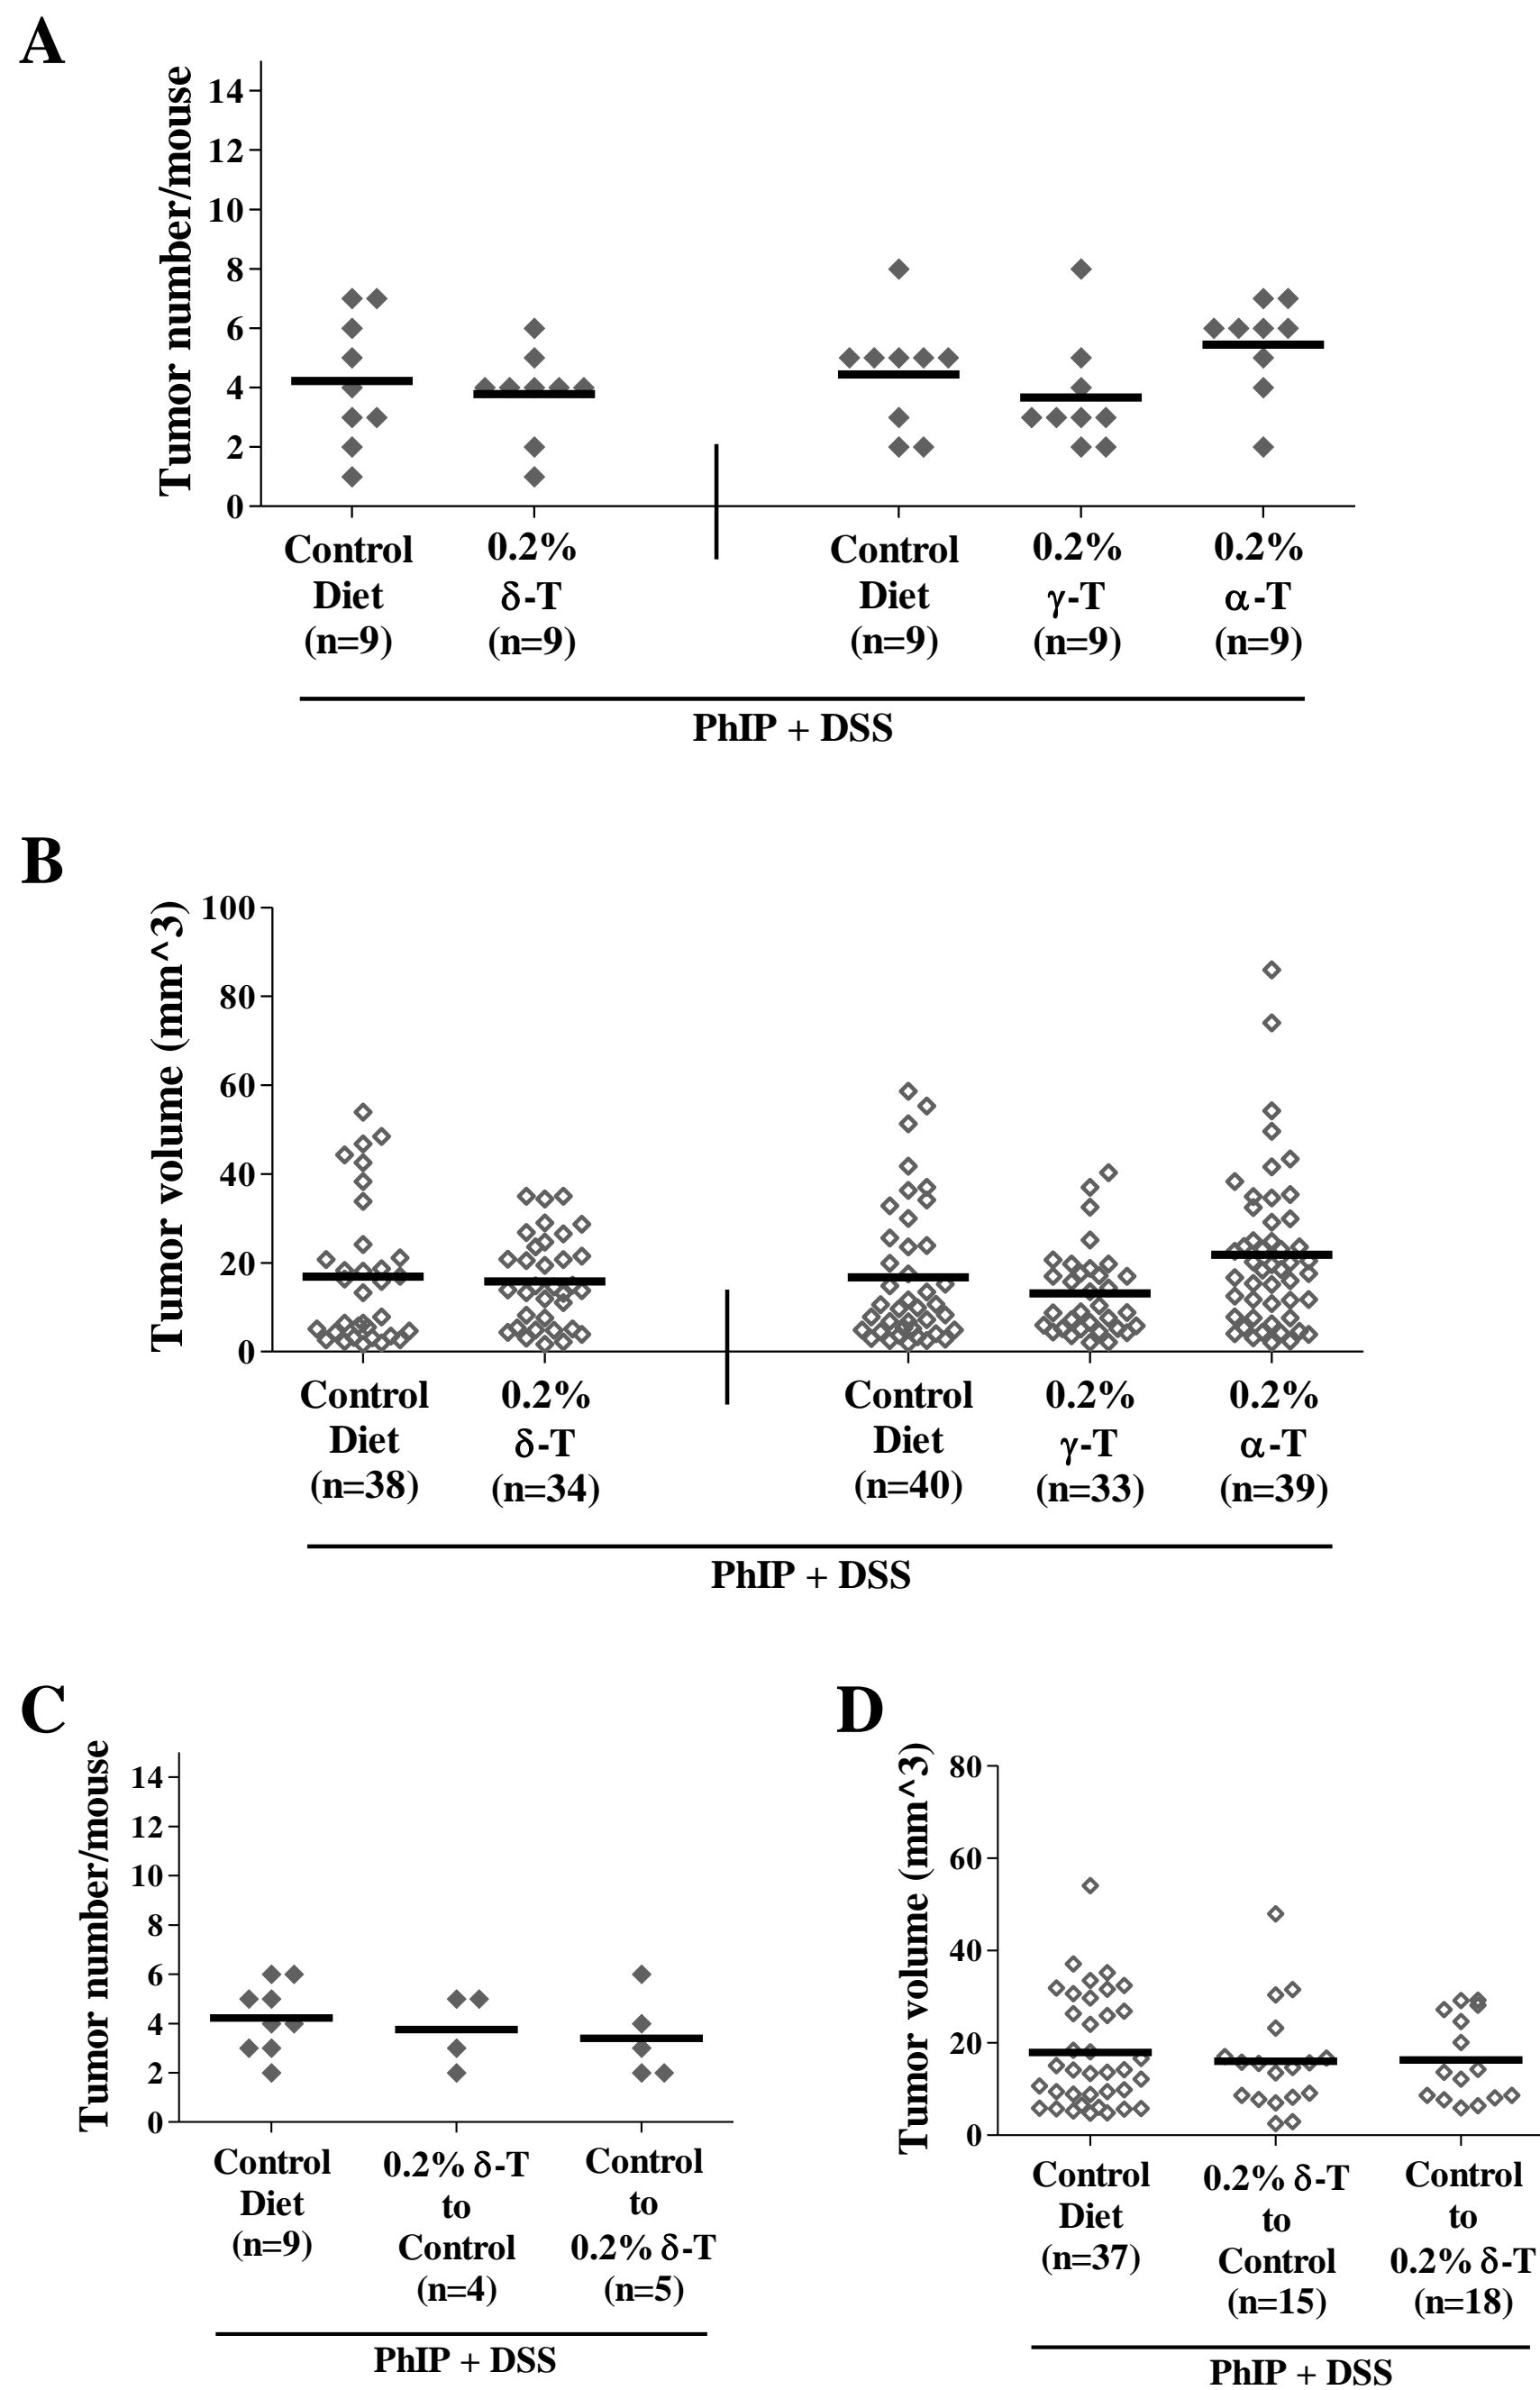

**Supplementary Figure S3. Null effect of different tocopherols on PhIP/DSS-induced colon tumorigenesis in female hCYP1A mice.** **A & B**, dietary tocopherol supplementation did not significantly change tumor multiplicity (Means  $\pm$  SD from left to right:  $4.2 \pm 2.1$ ,  $3.8 \pm 1.5$ ,  $4.4 \pm 1.9$ ,  $3.7 \pm 1.9$ , and  $5.4 \pm 1.6$ ) or tumor volumes (Means  $\pm$  SD from left to right:  $16.9 \pm 16.0$ ,  $15.9 \pm 10.1$ ,  $16.7 \pm 15.7$ ,  $13.1 \pm 9.9$ , and  $21.8 \pm 17.7$ ) in female mice, respectively. **C & D**,  $\delta$ -T supplementation before or after PhIP/DSS treatment did not altered tumor multiplicity (Means  $\pm$  SD from left to right:  $4.2 \pm 1.4$ ,  $3.8 \pm 1.5$ ,  $3.4 \pm 1.7$ ) or volume (Means  $\pm$  SD from left to right:  $17.9 \pm 12.1$ ,  $16.0 \pm 11.4$ ,  $16.3 \pm 9.1$ ) in female mice, respectively. Statistical analysis were done using two-tailed Student's *t*-test or ANOVA-Dunnnett (\*\* $P < 0.001$ , \*\* $P < 0.01$ , \* $P < 0.05$ ).
